# Supplementary material for: Obesity Risk-Factor Variation Based on Island Clusters: A Secondary Analysis of Indonesian Basic Health Research 2018
Source: MDPI journal article supplement (doi:10.3390/nu14050971), 2022-02-24
Supplement: s1 [file s1]

## Supplementary Material

### Supplementary Tables

**Table S1A.** Obesity prevalence by provinces in Indonesia from RISKESDAS 2018

| Island cluster         | Province                  | Obesity Status |       |
|------------------------|---------------------------|----------------|-------|
|                        |                           | Non-obese      | Obese |
| Sumatera               | Aceh                      | 61.70          | 38.30 |
|                        | North Sumatera            | 59.40          | 40.60 |
|                        | West Sumatera             | 66.50          | 33.50 |
|                        | Riau                      | 61.90          | 38.10 |
|                        | Jambi                     | 69.10          | 30.90 |
|                        | South Sumatera            | 69.60          | 30.40 |
|                        | Bengkulu                  | 67.00          | 33.00 |
|                        | Lampung                   | 70.40          | 29.60 |
|                        | Kepulauan Bangka Belitung | 62.60          | 37.40 |
|                        | Kepulauan Riau            | 60.20          | 39.80 |
| Java                   | DKI Jakarta               | 54.40          | 45.60 |
|                        | West Java                 | 63.30          | 36.70 |
|                        | Central Java              | 66.70          | 33.30 |
|                        | DI Yogyakarta             | 65.40          | 34.60 |
|                        | East Java                 | 65.40          | 36.10 |
|                        | Banten                    | 64.70          | 35.30 |
| Bali and Nusa Tenggara | Bali                      | 61.20          | 38.80 |
|                        | Nusa Tenggara Barat       | 73.30          | 26.70 |
|                        | Nusa Tenggara Timur       | 80.90          | 19.10 |
| Kalimantan             | West Kalimantan           | 69.70          | 30.30 |
|                        | Central Kalimantan        | 68.10          | 31.90 |
|                        | South Kalimantan          | 67.00          | 33.00 |
|                        | East Kalimantan           | 55.90          | 44.10 |
|                        | North Kalimantan          | 59.80          | 40.20 |
| Sulawesi               | North Sulawesi            | 53.40          | 46.60 |
|                        | Central Sulawesi          | 65.50          | 34.50 |
|                        | South Sulawesi            | 67.90          | 32.10 |
|                        | Southeast Sulawesi        | 67.60          | 32.40 |
|                        | Gorontalo                 | 60.80          | 39.20 |
|                        | West Sulawesi             | 68.60          | 31.40 |
| Maluku                 | Maluku                    | 67.00          | 33.00 |

|       |              |       |       |
|-------|--------------|-------|-------|
| Papua | North Maluku | 62.10 | 37.90 |
|       | West Papua   | 60.40 | 39.60 |
|       | Papua        | 65.00 | 35.00 |

**Table S2A.** Odd ratio of obesity based on the risk factors in Indonesia from RISKESDAS 2018

| Variables                                    |              | Sumatera             | Java                 | Bali and<br>Nusa<br>Tenggara | Kalimantan           | Sulawesi             | Maluku               | Papua                |
|----------------------------------------------|--------------|----------------------|----------------------|------------------------------|----------------------|----------------------|----------------------|----------------------|
| Constant                                     | Odd<br>Ratio | 0.2                  | 0.176                | 0.083                        | 0.11                 | 0.13                 | 0.104                | 0.282                |
| <b>Location (X1) -&gt; Rural</b>             |              |                      |                      |                              |                      |                      |                      |                      |
| Urban                                        | Odd<br>Ratio | <b>1.271</b>         | 1.372                | <b>1.627</b>                 | 1.442                | 1.348                | 1.497                | 1.287                |
|                                              | (95% CI)     | (1.269-<br>1.273)*** | (1.37-<br>1.374)***  | (1.62-<br>1.634)***          | (1.437-<br>1.447)*** | (1.343-<br>1.352)*** | (1.483-<br>1.51)***  | (1.278-<br>1.297)*** |
| <b>Sex (X2) -&gt; Male</b>                   |              |                      |                      |                              |                      |                      |                      |                      |
| Female                                       | Odd<br>Ratio | 1.804                | 1.94                 | 1.79                         | 1.901                | 1.63                 | 2.169                | 1.703                |
|                                              | (95% CI)     | (1.8-<br>1.808)***   | (1.937-<br>1.943)*** | (1.779-<br>1.801)***         | (1.892-<br>1.91)***  | (1.623-<br>1.638)*** | (2.142-<br>2.196)*** | (1.689-<br>1.718)*** |
| <b>Marital Status (X3) -&gt; Not married</b> |              |                      |                      |                              |                      |                      |                      |                      |
| Married                                      | Odd<br>Ratio | 2.724                | 2.321                | 2.503                        | 2.193                | 2.66                 | 3.312                | 2.457                |
|                                              | (95% CI)     | (2.717-<br>2.731)*** | (2.317-<br>2.326)*** | (2.487-<br>2.52)***          | (2.181-<br>2.205)*** | (2.646-<br>2.673)*** | (3.267-<br>3.358)*** | (2.429-<br>2.485)*** |
| Divorce                                      | Odd<br>Ratio | 1.884                | 1.683                | 2.032                        | 1.251                | 1.742                | 2.218                | 2.28                 |
|                                              | (95% CI)     | (1.873-<br>1.895)*** | (1.676-<br>1.689)*** | (2.004-<br>2.06)***          | (1.235-<br>1.267)*** | (1.723-<br>1.762)*** | (2.147-<br>2.291)*** | (2.213-<br>2.349)*** |
| Widow                                        | Odd<br>Ratio | 2.024                | 1.85                 | 1.837                        | 1.358                | 1.841                | 2.797                | 2.143                |
|                                              | (95% CI)     | (2.016-<br>2.033)*** | (1.845-<br>1.856)*** | (1.817-<br>1.858)***         | (1.345-<br>1.372)*** | (1.826-<br>1.856)*** | (2.734-<br>2.861)*** | (2.101-<br>2.185)*** |
| <b>Age (X4) -&gt; &lt;= 47 years</b>         |              |                      |                      |                              |                      |                      |                      |                      |
| 48-63 years                                  | Odd<br>Ratio | 0.788                | 0.724                | 0.806                        | 0.745                | 0.762                | 0.809                | 0.97                 |
|                                              | (95% CI)     | (0.787-<br>0.79)***  | (0.724-<br>0.725)*** | (0.802-<br>0.81)***          | (0.742-<br>0.748)*** | (0.759-<br>0.765)*** | (0.801-<br>0.818)*** | (0.962-<br>0.979)*** |
| >=64 years                                   | Odd<br>Ratio | 0.336                | 0.273                | 0.331                        | 0.352                | 0.335                | 0.359                | 0.349                |
|                                              | (95% CI)     | (0.335-<br>0.338)*** | (0.273-<br>0.274)*** | (0.328-<br>0.335)***         | (0.349-<br>0.355)*** | (0.333-<br>0.338)*** | (0.352-<br>0.366)*** | (0.341-<br>0.357)*** |
| <b>Education level (X5) -&gt; High</b>       |              |                      |                      |                              |                      |                      |                      |                      |
| Low                                          | Odd<br>Ratio | 0.753                | 0.754                | 0.868                        | 0.807                | 0.877                | 0.825                | 0.63                 |
|                                              | (95% CI)     | (0.75-<br>0.756)***  | (0.752-<br>0.756)*** | (0.861-<br>0.874)***         | (0.801-<br>0.813)*** | (0.872-<br>0.883)*** | (0.812-<br>0.839)*** | (0.621-<br>0.639)*** |
| <b>Occupation (X6) -&gt; Unemployed</b>      |              |                      |                      |                              |                      |                      |                      |                      |
| Student                                      | Odd<br>Ratio | 0.777                | 0.814                | 0.866                        | 0.754                | 0.671                | 0.646                | 0.788                |
|                                              | (95% CI)     | (0.773-<br>0.781)*** | (0.811-<br>0.816)*** | (0.857-<br>0.876)***         | (0.747-<br>0.761)*** | (0.665-<br>0.677)*** | (0.631-<br>0.661)*** | (0.774-<br>0.803)*** |
| Government officer/<br>military/ police      | Odd<br>Ratio | 1.475                | 1.429                | 1.587                        | 1.479                | 1.28                 | 1.826                | 1.565                |

|                                                                    |           |                  |                  |                  |                  |                  |                  |                  |
|--------------------------------------------------------------------|-----------|------------------|------------------|------------------|------------------|------------------|------------------|------------------|
| Private company officer                                            | (95% CI)  | (1.468-1.482)*** | (1.424-1.434)*** | (1.572-1.603)*** | (1.467-1.491)*** | (1.271-1.29)***  | (1.796-1.856)*** | (1.543-1.587)*** |
|                                                                    | Odd Ratio | 1.119            | 1.078            | 1.541            | 1.251            | 1.126            | 1.609            | 0.95             |
| Entrepreneur                                                       | (95% CI)  | (1.115-1.124)*** | (1.076-1.08)***  | (1.53-1.552)***  | (1.244-1.258)*** | (1.118-1.133)*** | (1.577-1.642)*** | (0.936-0.964)*** |
|                                                                    | Odd Ratio | 1.295            | 1.302            | 1.775            | 1.251            | 1.235            | 1.737            | 1.084            |
| Farmer                                                             | (95% CI)  | (1.291-1.298)*** | (1.3-1.304)***   | (1.764-1.786)*** | (1.244-1.257)*** | (1.229-1.241)*** | (1.711-1.762)*** | (1.072-1.097)*** |
|                                                                    | Odd Ratio | 0.7              | 0.627            | 0.648            | 0.641            | 0.639            | 0.754            | 0.611            |
| Fisherman                                                          | (95% CI)  | (0.698-0.701)*** | (0.626-0.628)*** | (0.644-0.652)*** | (0.637-0.644)*** | (0.636-0.643)*** | (0.744-0.763)*** | (0.605-0.617)*** |
|                                                                    | Odd Ratio | 0.68             | 1.008            | 1.337            | 0.964            | 0.691            | 0.571            | 0.505            |
| Labor/ driver/<br>housekeeper                                      | (95% CI)  | (0.673-0.688)*** | (0.999-1.017)    | (1.311-1.364)*** | (0.948-0.98)***  | (0.682-0.699)*** | (0.55-0.592)***  | (0.49-0.52)***   |
|                                                                    | Odd Ratio | 0.874            | 0.831            | 0.983            | 0.857            | 0.924            | 1.281            | 0.763            |
| Others                                                             | (95% CI)  | (0.871-0.878)*** | (0.83-0.833)***  | (0.975-0.991)*** | (0.85-0.864)***  | (0.917-0.93)***  | (1.255-1.308)*** | (0.747-0.779)*** |
|                                                                    | Odd Ratio | 1.138            | 1.07             | 1.146            | 1.07             | 1.037            | 1.394            | 1.312            |
| <b>Mental emotional status (X7) -&gt; Without mental emotional</b> |           |                  |                  |                  |                  |                  |                  |                  |
| With mental emotional                                              | Odd Ratio | 1.027            | 0.982            | 0.934            | 0.973            | 0.906            | 0.779            | 1.116            |
|                                                                    | (95% CI)  | (1.024-1.03)***  | (0.98-0.984)***  | (0.929-0.94)***  | (0.967-0.978)*** | (0.902-0.91)***  | (0.769-0.789)*** | (1.104-1.128)*** |
| <b>Sweet food (X8) -&gt; &lt;3 times / month</b>                   |           |                  |                  |                  |                  |                  |                  |                  |
| >1 time/day                                                        | Odd Ratio | 0.987            | 0.906            | 1.048            | 0.888            | 1.028            | 1.235            | 1.012            |
|                                                                    | (95% CI)  | (0.983-0.99)***  | (0.904-0.908)*** | (1.039-1.057)*** | (0.882-0.895)*** | (1.021-1.035)*** | (1.213-1.256)*** | (0.999-1.025)    |
| <b>Sugar sweetened beverages (X9) -&gt; &lt;3 times / month</b>    |           |                  |                  |                  |                  |                  |                  |                  |
| >1 time/day                                                        | Odd Ratio | 0.807            | 0.809            | 0.824            | 0.809            | 0.832            | 0.744            | 0.858            |
|                                                                    | (95% CI)  | (0.804-0.81)***  | (0.807-0.81)***  | (0.819-0.83)***  | (0.803-0.815)*** | (0.827-0.837)*** | (0.731-0.756)*** | (0.848-0.869)*** |
| <b>Food high in salt (X10) -&gt; &lt;3 times / month</b>           |           |                  |                  |                  |                  |                  |                  |                  |
| >1 time/day                                                        | Odd Ratio | 0.858            | 0.916            | 1.173            | 1.002            | 0.885            | 1.264            | 0.86             |
|                                                                    | (95% CI)  | (0.855-0.861)*** | (0.915-0.918)*** | (1.161-1.185)*** | (0.996-1.009)    | (0.879-0.891)*** | (1.24-1.287)***  | (0.846-0.874)*** |
| <b>High-fat food (X11) -&gt; &lt;3 times / month</b>               |           |                  |                  |                  |                  |                  |                  |                  |
| >1 time/day                                                        | Odd Ratio | 1.183            | 1.158            | 1.406            | 1.245            | 1.482            | 1.133            | 1.141            |
|                                                                    | (95% CI)  | (1.179-1.187)*** | (1.156-1.161)*** | (1.397-1.416)*** | (1.238-1.253)*** | (1.473-1.491)*** | (1.115-1.152)*** | (1.126-1.156)*** |

|                                                          |           |                  |                  |                  |                  |                  |                  |                  |
|----------------------------------------------------------|-----------|------------------|------------------|------------------|------------------|------------------|------------------|------------------|
| <b>Meat food (X12) -&gt; &lt;3 times / month</b>         |           |                  |                  |                  |                  |                  |                  |                  |
| >1 time/day                                              | Odd Ratio | 1.356            | 0.887            | 1.088            | 1.024            | 1.01             | 0.982            | 1.104            |
|                                                          | (95% CI)  | (1.343-1.369)*** | (0.883-0.891)*** | (1.067-1.109)*** | (1.009-1.04)***  | (0.997-1.023)    | (0.964-1.001)    | (1.078-1.13)***  |
| <b>Carbonated drinks (X13) -&gt; &lt;3 times / month</b> |           |                  |                  |                  |                  |                  |                  |                  |
| >1 time/day                                              | Odd Ratio | 0.984            | 0.902            | 0.839            | 0.868            | 1.525            | 1.609            | 1.809            |
|                                                          | (95% CI)  | (0.971-0.997)*   | (0.896-0.908)*** | (0.816-0.863)*** | (0.849-0.887)*** | (1.499-1.551)*** | (1.552-1.668)*** | (1.758-1.861)*** |
| <b>Energy drink (X14) -&gt; &lt;3 times / month</b>      |           |                  |                  |                  |                  |                  |                  |                  |
| >1 time/day                                              | Odd Ratio | 0.953            | 1.171            | 0.561            | 0.849            | 0.88             | 0.928            | 1.01             |
|                                                          | (95% CI)  | (0.939-0.967)*** | (1.162-1.18)***  | (0.54-0.583)***  | (0.832-0.867)*** | (0.862-0.897)*** | (0.898-0.959)*** | (0.985-1.036)    |
| <b>Instant food (X15) -&gt; &lt;3 times / month</b>      |           |                  |                  |                  |                  |                  |                  |                  |
| >1 time/day                                              | Odd Ratio | 0.87             | 1.038            | 0.968            | 0.827            | 0.78             | 0.926            | 0.992            |
|                                                          | (95% CI)  | (0.864-0.876)*** | (1.034-1.042)*** | (0.953-0.984)*** | (0.818-0.837)*** | (0.773-0.787)*** | (0.907-0.946)*** | (0.975-1.009)    |
| <b>FV consumption (X16) -&gt; Adequate</b>               |           |                  |                  |                  |                  |                  |                  |                  |
| Inadequate                                               | Odd Ratio | 0.894            | 0.83             | 0.799            | 0.77             | 0.96             | 0.775            | 0.724            |
|                                                          | (95% CI)  | (0.89-0.898)***  | (0.828-0.832)*** | (0.793-0.805)*** | (0.765-0.776)*** | (0.953-0.966)*** | (0.764-0.786)*** | (0.715-0.732)*** |
| <b>Smoking behavior (X17) -&gt; Never smoke</b>          |           |                  |                  |                  |                  |                  |                  |                  |
| Quitted                                                  | Odd Ratio | 1.143            | 1.065            | 1.077            | 1.12             | 0.917            | 1.501            | 1.063            |
|                                                          | (95% CI)  | (1.138-1.148)*** | (1.063-1.068)*** | (1.067-1.087)*** | (1.112-1.129)*** | (0.91-0.923)***  | (1.469-1.533)*** | (1.043-1.083)*** |
| Currently smoke                                          | Odd Ratio | 0.794            | 0.693            | 0.685            | 0.709            | 0.664            | 0.822            | 0.779            |
|                                                          | (95% CI)  | (0.792-0.797)*** | (0.692-0.694)*** | (0.68-0.69)***   | (0.706-0.713)*** | (0.661-0.668)*** | (0.811-0.833)*** | (0.771-0.786)*** |
| <b>Physical activity (X18) -&gt; Active</b>              |           |                  |                  |                  |                  |                  |                  |                  |
| Inactive                                                 | Odd Ratio | 1.009            | 1.099            | 1.093            | 1.113            | 1.028            | 1.026            | 1.05             |
|                                                          | (95% CI)  | (1.008-1.011)*** | (1.098-1.1)***   | (1.089-1.098)*** | (1.109-1.117)*** | (1.024-1.031)*** | (1.017-1.035)*** | (1.043-1.057)*** |
| <b>Alcohol consumption (X19) -&gt; No</b>                |           |                  |                  |                  |                  |                  |                  |                  |
| Yes                                                      | Odd Ratio | 0.835            | 0.75             | 0.763            | 1.085            | 0.954            | 1.132            | 1.02             |
|                                                          | (95% CI)  | (0.83-0.839)***  | (0.747-0.753)*** | (0.758-0.768)*** | (1.075-1.095)*** | (0.948-0.96)***  | (1.115-1.151)*** | (1.005-1.036)*   |
| <b>Blood pressure (X20) -&gt; Normal</b>                 |           |                  |                  |                  |                  |                  |                  |                  |
| Prehypertension                                          | Odd Ratio | 2.259            | 2.438            | 2.745            | 2.434            | 2.512            | 2.413            | 2.059            |
|                                                          | (95% CI)  | (2.254-2.265)*** | (2.435-2.442)*** | (2.731-2.759)*** | (2.421-2.446)*** | (2.502-2.522)*** | (2.388-2.439)*** | (2.042-2.076)*** |

|                      |           |                  |                  |                  |                  |                  |                  |                  |
|----------------------|-----------|------------------|------------------|------------------|------------------|------------------|------------------|------------------|
| Hypertension stage 1 | Odd Ratio | 3.94             | 4.382            | 4.765            | 4.619            | 4.049            | 4.695            | 3.654            |
|                      | (95% CI)  | (3.929-3.95)***  | (4.375-4.389)*** | (4.736-4.793)*** | (4.594-4.644)*** | (4.031-4.068)*** | (4.638-4.752)*** | (3.618-3.69)***  |
| Hypertension stage 2 | Odd Ratio | 5.984            | 6.556            | 7.398            | 6.731            | 5.684            | 6.358            | 5.165            |
|                      | (95% CI)  | (5.966-6.003)*** | (6.544-6.568)*** | (7.347-7.448)*** | (6.692-6.771)*** | (5.655-5.714)*** | (6.266-6.451)*** | (5.099-5.232)*** |

†CI: Confidence of interval

\*\*\*: Very significant

**Table S3A.** Effect size of odd ratios for marital status variable

| Island cluster comparison       | Cohen's d  |       |        |             | Cliff's Delta |         |       |             |        |            |
|---------------------------------|------------|-------|--------|-------------|---------------|---------|-------|-------------|--------|------------|
|                                 | D          | 95 CI |        | Effect Size | D             | 95 CI   |       | Effect Size |        |            |
|                                 | Estimation | Lower | Upper  |             | Estimation    | Lower   | Upper |             |        |            |
| Sumatera - Java                 | 0.5363     | -     | 1.7710 | 2.8437      | medium        | 0.5556  | -     | 0.6148      | 0.9618 | large      |
| Sumatera - Bali_Nusa Tenggara   | 0.3756     | -     | 1.9113 | 2.6624      | small         | 0.5556  | -     | 0.6148      | 0.9618 | large      |
| Sumatera - Kalimantan           | 0.7767     | -     | 1.5742 | 3.1275      | medium        | 0.5556  | -     | 0.6148      | 0.9618 | large      |
| Sumatera - Sulawesi             | 0.5010     | -     | 1.8012 | 2.8033      | medium        | 0.5556  | -     | 0.6148      | 0.9618 | large      |
| Sumatera - Maluku               | 0.0138     | -     | 2.2532 | 2.2808      | negligible    | 0.1111  | -     | 0.8227      | 0.8828 | negligible |
| Sumatera - Papua                | -0.1473    | -     | 2.4173 | 2.1227      | negligible    | -0.1111 | -     | 0.8828      | 0.8227 | negligible |
| Java - Bali_Nusa Tenggara       | -0.0861    | -     | 2.3541 | 2.1819      | negligible    | 0.1111  | -     | 0.5660      | 0.6987 | negligible |
| Java - Kalimantan               | 0.3679     | -     | 1.9182 | 2.6539      | small         | 0.3333  | -     | 0.5107      | 0.8502 | medium     |
| Java - Sulawesi                 | 0.0613     | -     | 2.2062 | 2.3288      | negligible    | 0.3333  | -     | 0.5107      | 0.8502 | medium     |
| Java - Maluku                   | -0.4515    | -     | 2.7472 | 1.8442      | small         | -0.1111 | -     | 0.7930      | 0.6943 | negligible |
| Java - Papua                    | -0.9087    | -     | 3.2897 | 1.4724      | large         | -0.3333 | -     | 0.9495      | 0.8121 | medium     |
| Bali_Nusa Tenggara - Kalimantan | 0.3955     | -     | 1.8935 | 2.6846      | small         | 0.5556  | -     | 0.6148      | 0.9618 | large      |
| Bali_Nusa Tenggara - Sulawesi   | 0.1268     | -     | 2.1424 | 2.3960      | negligible    | 0.5556  | -     | 0.6148      | 0.9618 | large      |
| Bali_Nusa Tenggara - Maluku     | -0.3253    | -     | 2.6072 | 1.9566      | small         | -0.1111 | -     | 0.7930      | 0.6943 | negligible |
| Bali_Nusa Tenggara - Papua      | -0.5929    | -     | 2.9091 | 1.7234      | medium        | -0.3333 | -     | 0.9495      | 0.8121 | medium     |
| Kalimantan - Sulawesi           | -0.2660    | -     | 2.5430 | 2.0109      | small         | -0.5556 | -     | 0.9618      | 0.6148 | large      |
| Kalimantan - Maluku             | -0.6934    | -     | 3.0275 | 1.6407      | medium        | -0.5556 | -     | 0.9618      | 0.6148 | large      |

|                    |         |             |        |            |         |             |        |            |
|--------------------|---------|-------------|--------|------------|---------|-------------|--------|------------|
| Kalimantan - Papua | -1.0542 | -<br>3.4735 | 1.3651 | large      | -0.3333 | -<br>0.9495 | 0.8121 | medium     |
| Sulawesi - Maluku  | -0.4406 | -<br>2.7349 | 1.8537 | small      | -0.1111 | -<br>0.7930 | 0.6943 | negligible |
| Sulawesi - Papua   | -0.7346 | -<br>3.0768 | 1.6075 | medium     | -0.3333 | -<br>0.9495 | 0.8121 | medium     |
| Maluku - Papua     | -0.1392 | -<br>2.4089 | 2.1305 | negligible | -0.1111 | -<br>0.8828 | 0.8227 | negligible |

---



**Table S3B.** Effect size of odd ratios for age variable

| Island cluster comparison       | Cohen's d    |       |        |             | Cliff's Delta |         |       |             |        |            |
|---------------------------------|--------------|-------|--------|-------------|---------------|---------|-------|-------------|--------|------------|
|                                 | D Estimation | 95 CI |        | Effect Size | D Estimation  | 95 CI   |       | Effect Size |        |            |
|                                 |              | Lower | Upper  |             |               | Lower   | Upper |             |        |            |
| Sumatera - Java                 | 0.2226       | -     | 4.0934 | 4.5385      | small         | 0.5000  | -     | 0.8416      | 0.9811 | large      |
| Sumatera - Bali_Nusa Tenggara   | 0.1625       | -     | 4.1472 | 4.4723      | negligible    | 0.5000  | -     | 0.8416      | 0.9811 | large      |
| Sumatera - Kalimantan           | 0.1913       | -     | 4.1212 | 4.5037      | negligible    | 0.0000  | -     | 0.9740      | 0.9740 | negligible |
| Sumatera - Sulawesi             | 0.1432       | -     | 4.1649 | 4.4514      | negligible    | 0.5000  | -     | 0.8416      | 0.9811 | large      |
| Sumatera - Maluku               | 0.0753       | -     | 4.2289 | 4.3795      | negligible    | 0.5000  | -     | 0.8416      | 0.9811 | large      |
| Sumatera - Papua                | -0.0594      | -     | 4.3630 | 4.2442      | negligible    | 0.0000  | -     | 0.9740      | 0.9740 | negligible |
| Java - Bali_Nusa Tenggara       | -0.0628      | -     | 4.3666 | 4.2409      | negligible    | -0.5000 | -     | 0.9811      | 0.8416 | large      |
| Java - Kalimantan               | -0.0607      | -     | 4.3644 | 4.2429      | negligible    | 0.0000  | -     | 0.9740      | 0.9740 | negligible |
| Java - Sulawesi                 | -0.0927      | -     | 4.3977 | 4.2123      | negligible    | -0.5000 | -     | 0.9811      | 0.8416 | large      |
| Java - Maluku                   | -0.1495      | -     | 4.4582 | 4.1591      | negligible    | -0.5000 | -     | 0.9811      | 0.8416 | large      |
| Java - Papua                    | -0.2686      | -     | 4.5906 | 4.0534      | small         | -0.5000 | -     | 0.9811      | 0.8416 | large      |
| Bali_Nusa Tenggara - Kalimantan | 0.0097       | -     | 4.2929 | 4.3124      | negligible    | 0.0000  | -     | 0.9740      | 0.9740 | negligible |
| Bali_Nusa Tenggara - Sulawesi   | -0.0273      | -     | 4.3301 | 4.2756      | negligible    | 0.0000  | -     | 0.9740      | 0.9740 | negligible |
| Bali_Nusa Tenggara - Maluku     | -0.0879      | -     | 4.3927 | 4.2168      | negligible    | -0.5000 | -     | 0.9811      | 0.8416 | large      |
| Bali_Nusa Tenggara - Papua      | -0.2126      | -     | 4.5274 | 4.1022      | small         | -0.5000 | -     | 0.9811      | 0.8416 | large      |
| Kalimantan - Sulawesi           | -0.0414      | -     | 4.3445 | 4.2618      | negligible    | 0.0000  | -     | 0.9740      | 0.9740 | negligible |
| Kalimantan - Maluku             | -0.1083      | -     | 4.4141 | 4.1975      | negligible    | 0.0000  | -     | 0.9740      | 0.9740 | negligible |

|                    |         |             |        |            |         |             |        |            |
|--------------------|---------|-------------|--------|------------|---------|-------------|--------|------------|
| Kalimantan - Papua | -0.2430 | -<br>4.5615 | 4.0755 | small      | 0.0000  | -<br>0.9740 | 0.9740 | negligible |
| Sulawesi - Maluku  | -0.0649 | -<br>4.3687 | 4.2388 | negligible | 0.0000  | -<br>0.9740 | 0.9740 | negligible |
| Sulawesi - Papua   | -0.1962 | -<br>4.5092 | 4.1168 | negligible | -0.5000 | -<br>0.9811 | 0.8416 | large      |
| Maluku - Papua     | -0.1307 | -<br>4.4379 | 4.1766 | negligible | -0.5000 | -<br>0.9811 | 0.8416 | large      |

---

**Table S3C.** Effect size of odd ratios for level of education variable

| Island cluster comparison       | Cohen's d    |       |        |             | Cliff's Delta |         |       |             |        |            |
|---------------------------------|--------------|-------|--------|-------------|---------------|---------|-------|-------------|--------|------------|
|                                 | D Estimation | 95 CI |        | Effect Size | D Estimation  | 95 CI   |       | Effect Size |        |            |
|                                 |              | Lower | Upper  |             |               | Lower   | Upper |             |        |            |
| Sumatera - Java                 | -0.2572      | -     | 4.5776 | 4.0632      | small         | -0.5000 | -     | 0.9811      | 0.8416 | large      |
| Sumatera - Bali_Nusa Tenggara   | -0.7920      | -     | 5.2602 | 3.6761      | medium        | -0.5000 | -     | 0.9811      | 0.8416 | large      |
| Sumatera - Kalimantan           | -0.7248      | -     | 5.1664 | 3.7169      | medium        | -0.5000 | -     | 0.9811      | 0.8416 | large      |
| Sumatera - Sulawesi             | -1.2149      | -     | 5.8977 | 3.4679      | large         | -0.5000 | -     | 0.9811      | 0.8416 | large      |
| Sumatera - Maluku               | -1.6729      | -     | 6.6718 | 3.3260      | large         | -1.0000 | -     | 1.0000      | 0.8283 | large      |
| Sumatera - Papua                | 1.1568       | -     | 3.4918 | 5.8054      | large         | 0.5000  | -     | 0.8416      | 0.9811 | large      |
| Java - Bali_Nusa Tenggara       | -0.5163      | -     | 4.8901 | 3.8574      | medium        | -0.5000 | -     | 0.9811      | 0.8416 | large      |
| Java - Kalimantan               | -0.4465      | -     | 4.8025 | 3.9094      | small         | -0.5000 | -     | 0.9811      | 0.8416 | large      |
| Java - Sulawesi                 | -0.8290      | -     | 5.3126 | 3.6547      | large         | -0.5000 | -     | 0.9811      | 0.8416 | large      |
| Java - Maluku                   | -1.2347      | -     | 5.9295 | 3.4600      | large         | -0.5000 | -     | 0.9811      | 0.8416 | large      |
| Java - Papua                    | 1.3304       | -     | 3.4245 | 6.0852      | large         | 0.5000  | -     | 0.8416      | 0.9811 | large      |
| Bali_Nusa Tenggara - Kalimantan | 0.0771       | -     | 4.2271 | 4.3814      | negligible    | 0.5000  | -     | 0.8416      | 0.9811 | large      |
| Bali_Nusa Tenggara - Sulawesi   | -0.1837      | -     | 4.4955 | 4.1280      | negligible    | 0.0000  | -     | 0.9740      | 0.9740 | negligible |
| Bali_Nusa Tenggara - Maluku     | -0.5524      | -     | 4.9364 | 3.8315      | medium        | -0.5000 | -     | 0.9811      | 0.8416 | large      |
| Bali_Nusa Tenggara - Papua      | 1.7839       | -     | 3.3030 | 6.8709      | large         | 1.0000  | -     | 0.8283      | 1.0000 | large      |
| Kalimantan - Sulawesi           | -0.2830      | -     | 4.6072 | 4.0411      | small         | 0.0000  | -     | 0.9740      | 0.9740 | negligible |
| Kalimantan - Maluku             | -0.6648      | -     | 5.0848 | 3.7551      | medium        | -0.5000 | -     | 0.9811      | 0.8416 | large      |

|                    |         |             |        |        |         |             |        |       |
|--------------------|---------|-------------|--------|--------|---------|-------------|--------|-------|
| Kalimantan - Papua | 1.7391  | -<br>3.3118 | 6.7900 | large  | 1.0000  | -<br>0.8283 | 1.0000 | large |
| Sulawesi - Maluku  | -0.5120 | -<br>4.8846 | 3.8606 | medium | -0.5000 | -<br>0.9811 | 0.8416 | large |
| Sulawesi - Papua   | 2.3335  | -<br>3.2445 | 7.9114 | large  | 1.0000  | -<br>0.8283 | 1.0000 | large |
| Maluku - Papua     | 2.7479  | -<br>3.2510 | 8.7468 | large  | 1.0000  | -<br>0.8283 | 1.0000 | large |

---

**Table S3D.** Effect size of odd ratios for occupational status variable

| Island cluster comparison       | Cohen's d  |       |        |             | Cliff's Delta |         |       |             |        |            |
|---------------------------------|------------|-------|--------|-------------|---------------|---------|-------|-------------|--------|------------|
|                                 | D          | 95 CI |        | Effect Size | D             | 95 CI   |       | Effect Size |        |            |
|                                 | Estimation | Lower | Upper  |             | Estimation    | Lower   | Upper |             |        |            |
| Sumatera - Java                 | -0.0849    | -     | 1.1577 | 0.9880      | negligible    | -0.0313 | -     | 0.5764      | 0.5331 | negligible |
| Sumatera - Bali_Nusa Tenggara   | -0.5219    | -     | 1.6124 | 0.5686      | medium        | -0.2500 | -     | 0.7117      | 0.3625 | small      |
| Sumatera - Kalimantan           | -0.0357    | -     | 1.1082 | 1.0367      | negligible    | -0.0625 | -     | 0.5963      | 0.5096 | negligible |
| Sumatera - Sulawesi             | 0.0722     | -     | 1.0005 | 1.1450      | negligible    | 0.1250  | -     | 0.4522      | 0.6284 | negligible |
| Sumatera - Maluku               | -0.4816    | -     | 1.5694 | 0.6063      | small         | -0.1250 | -     | 0.6622      | 0.4971 | negligible |
| Sumatera - Papua                | 0.0008     | -     | 1.0715 | 1.0732      | negligible    | 0.0625  | -     | 0.5041      | 0.5915 | negligible |
| Java - Bali_Nusa Tenggara       | -0.4422    | -     | 1.5276 | 0.6432      | small         | -0.2188 | -     | 0.6977      | 0.3953 | small      |
| Java - Kalimantan               | 0.0542     | -     | 1.0184 | 1.1268      | negligible    | 0.0000  | -     | 0.5450      | 0.5450 | negligible |
| Java - Sulawesi                 | 0.1534     | -     | 0.9205 | 1.2274      | negligible    | 0.1250  | -     | 0.4583      | 0.6330 | negligible |
| Java - Maluku                   | -0.4146    | -     | 1.4984 | 0.6693      | small         | -0.1250 | -     | 0.6504      | 0.4813 | negligible |
| Java - Papua                    | 0.0810     | -     | 0.9918 | 1.1539      | negligible    | -0.0313 | -     | 0.5663      | 0.5224 | negligible |
| Bali_Nusa Tenggara - Kalimantan | 0.5075     | -     | 0.5820 | 1.5970      | medium        | 0.2188  | -     | 0.3953      | 0.6977 | small      |
| Bali_Nusa Tenggara - Sulawesi   | 0.5756     | -     | 0.5188 | 1.6700      | medium        | 0.2031  | -     | 0.4036      | 0.6858 | small      |
| Bali_Nusa Tenggara - Maluku     | -0.0252    | -     | 1.0976 | 1.0472      | negligible    | 0.0313  | -     | 0.5278      | 0.5714 | negligible |
| Bali_Nusa Tenggara - Papua      | 0.5045     | -     | 0.5848 | 1.5938      | medium        | 0.2188  | -     | 0.3886      | 0.6936 | small      |
| Kalimantan - Sulawesi           | 0.1110     | -     | 0.9623 | 1.1842      | negligible    | 0.0625  | -     | 0.5041      | 0.5915 | negligible |
| Kalimantan - Maluku             | -0.4671    | -     | 1.5540 | 0.6198      | small         | -0.1563 | -     | 0.6749      | 0.4657 | small      |

|                    |         |             |        |            |         |             |        |            |
|--------------------|---------|-------------|--------|------------|---------|-------------|--------|------------|
| Kalimantan - Papua | 0.0343  | -<br>1.0382 | 1.1068 | negligible | 0.0000  | -<br>0.5450 | 0.5450 | negligible |
| Sulawesi - Maluku  | -0.5281 | -<br>1.6191 | 0.5628 | medium     | -0.1875 | -<br>0.6867 | 0.4319 | small      |
| Sulawesi - Papua   | -0.0670 | -<br>1.1397 | 1.0056 | negligible | 0.0000  | -<br>0.5450 | 0.5450 | negligible |
| Maluku - Papua     | 0.4695  | -<br>0.6176 | 1.5565 | small      | 0.1563  | -<br>0.4486 | 0.6629 | small      |

---

**Table S3E.** Effect size of odd ratios for sweet food consumption variable

| Island cluster comparison       | Cohen's d    |             |                |             | Cliff's Delta |             |               |             |
|---------------------------------|--------------|-------------|----------------|-------------|---------------|-------------|---------------|-------------|
|                                 | D Estimation | 95 CI Lower | 95 CI Upper    | Effect Size | D Estimation  | 95 CI Lower | 95 CI Upper   | Effect Size |
| Sumatera - Java                 | 3.9928       | -3.4507     | 11.4362        | large       | 1.0000        | -           | 0.8283 1.0000 | large       |
| Sumatera - Bali_Nusa Tenggara   | -3.6814      | -           | 10.7437 3.3808 | large       | -1.0000       | -           | 1.0000 0.8283 | large       |
| Sumatera - Kalimantan           | 5.1240       | -3.7794     | 14.0274        | large       | 1.0000        | -           | 0.8283 1.0000 | large       |
| Sumatera - Sulawesi             | -3.0184      | -9.3110     | 3.2741         | large       | -1.0000       | -           | 1.0000 0.8283 | large       |
| Sumatera - Maluku               | -5.6110      | -           | 15.1697 3.9477 | large       | -1.0000       | -           | 1.0000 0.8283 | large       |
| Sumatera - Papua                | 0.7955       | -3.6741     | 5.2650         | medium      | 0.5000        | -           | 0.8416 0.9811 | large       |
| Java - Bali_Nusa Tenggara       | -15.7735     | -           | 40.1512 8.6042 | large       | -1.0000       | -           | 1.0000 0.8283 | large       |
| Java - Kalimantan               | 1.8701       | -3.2880     | 7.0282         | large       | 1.0000        | -           | 0.8283 1.0000 | large       |
| Java - Sulawesi                 | -7.4808      | -           | 19.6471 4.6854 | large       | -1.0000       | -           | 1.0000 0.8283 | large       |
| Java - Maluku                   | -13.3527     | -           | 34.1157 7.4103 | large       | -1.0000       | -           | 1.0000 0.8283 | large       |
| Java - Papua                    | -0.2729      | -4.5955     | 4.0498         | small       | 0.0000        | -           | 0.9740 0.9740 | negligible  |
| Bali_Nusa Tenggara - Kalimantan | 16.2105      | -8.8218     | 41.2428        | large       | 1.0000        | -           | 0.8283 1.0000 | large       |
| Bali_Nusa Tenggara - Sulawesi   | -0.6887      | -5.1171     | 3.7397         | medium      | 0.0000        | -           | 0.9740 0.9740 | negligible  |
| Bali_Nusa Tenggara - Maluku     | -4.5468      | -           | 12.6924 3.5989 | large       | -1.0000       | -           | 1.0000 0.8283 | large       |
| Bali_Nusa Tenggara - Papua      | 1.7184       | -3.3161     | 6.7530         | large       | 1.0000        | -           | 0.8283 1.0000 | large       |
| Kalimantan - Sulawesi           | -8.4577      | -           | 22.0241 5.1087 | large       | -1.0000       | -           | 1.0000 0.8283 | large       |
| Kalimantan - Maluku             | -14.2597     | -           | 36.3745 7.8550 | large       | -1.0000       | -           | 1.0000 0.8283 | large       |

|                    |         |         |        |        |         |             |        |            |
|--------------------|---------|---------|--------|--------|---------|-------------|--------|------------|
| Kalimantan - Papua | -0.6248 | -5.0312 | 3.7816 | medium | 0.0000  | -<br>0.9740 | 0.9740 | negligible |
| Sulawesi - Maluku  | -1.8220 | -6.9401 | 3.2961 | large  | -1.0000 | -<br>1.0000 | 0.8283 | large      |
| Sulawesi - Papua   | 1.8377  | -3.2934 | 6.9688 | large  | 1.0000  | -<br>0.8283 | 1.0000 | large      |
| Maluku - Papua     | 2.4306  | -3.2425 | 8.1037 | large  | 1.0000  | -<br>0.8283 | 1.0000 | large      |

---



**Table S3F.** Effect size of odd ratios for sugar-sweetened beverages consumption variable

| Island cluster comparison       | Cohen's d  |       |        |             | Cliff's Delta |         |       |             |        |            |
|---------------------------------|------------|-------|--------|-------------|---------------|---------|-------|-------------|--------|------------|
|                                 | D          | 95 CI |        | Effect Size | D             | 95 CI   |       | Effect Size |        |            |
|                                 | Estimation | Lower | Upper  |             | Estimation    | Lower   | Upper |             |        |            |
| Sumatera - Java                 | -0.5412    | -     | 4.9219 | 3.8395      | medium        | -0.5000 | -     | 0.9811      | 0.8416 | large      |
| Sumatera - Bali_Nusa Tenggara   | -0.4268    | -     | 4.7782 | 3.9246      | small         | -0.5000 | -     | 0.9811      | 0.8416 | large      |
| Sumatera - Kalimantan           | -0.6687    | -     | 5.0900 | 3.7525      | medium        | -0.5000 | -     | 0.9811      | 0.8416 | large      |
| Sumatera - Sulawesi             | -1.6816    | -     | 6.6872 | 3.3241      | large         | -1.0000 | -     | 1.0000      | 0.8283 | large      |
| Sumatera - Maluku               | -1.1464    | -     | 5.7891 | 3.4962      | large         | -0.5000 | -     | 0.9811      | 0.8416 | large      |
| Sumatera - Papua                | -0.6885    | -     | 5.1168 | 3.7398      | medium        | -0.5000 | -     | 0.9811      | 0.8416 | large      |
| Java - Bali_Nusa Tenggara       | 0.0277     | -     | 4.2752 | 4.3305      | negligible    | 0.0000  | -     | 0.9740      | 0.9740 | negligible |
| Java - Kalimantan               | -0.1638    | -     | 4.4736 | 4.1461      | negligible    | -0.5000 | -     | 0.9811      | 0.8416 | large      |
| Java - Sulawesi                 | -1.1468    | -     | 5.7897 | 3.4961      | large         | -0.5000 | -     | 0.9811      | 0.8416 | large      |
| Java - Maluku                   | -0.4833    | -     | 4.8483 | 3.8817      | small         | 0.0000  | -     | 0.9740      | 0.9740 | negligible |
| Java - Papua                    | -0.2739    | -     | 4.5967 | 4.0489      | small         | 0.0000  | -     | 0.9740      | 0.9740 | negligible |
| Bali_Nusa Tenggara - Kalimantan | -0.1652    | -     | 4.4752 | 4.1448      | negligible    | -0.5000 | -     | 0.9811      | 0.8416 | large      |
| Bali_Nusa Tenggara - Sulawesi   | -0.9642    | -     | 5.5100 | 3.5816      | large         | -0.5000 | -     | 0.9811      | 0.8416 | large      |
| Bali_Nusa Tenggara - Maluku     | -0.3983    | -     | 4.7434 | 3.9468      | small         | 0.0000  | -     | 0.9740      | 0.9740 | negligible |
| Bali_Nusa Tenggara - Papua      | -0.2665    | -     | 4.5882 | 4.0552      | small         | -0.5000 | -     | 0.9811      | 0.8416 | large      |
| Kalimantan - Sulawesi           | -0.8947    | -     | 5.4075 | 3.6181      | large         | -0.5000 | -     | 0.9811      | 0.8416 | large      |
| Kalimantan - Maluku             | -0.2325    | -     | 4.5496 | 4.0847      | small         | 0.0000  | -     | 0.9740      | 0.9740 | negligible |

|                    |         |             |        |            |        |             |        |            |
|--------------------|---------|-------------|--------|------------|--------|-------------|--------|------------|
| Kalimantan - Papua | -0.1348 | -<br>4.4423 | 4.1727 | negligible | 0.0000 | -<br>0.9740 | 0.9740 | negligible |
| Sulawesi - Maluku  | 1.0110  | -<br>3.5583 | 5.5802 | large      | 0.5000 | -<br>0.8416 | 0.9811 | large      |
| Sulawesi - Papua   | 0.5731  | -<br>3.8170 | 4.9631 | medium     | 0.5000 | -<br>0.8416 | 0.9811 | large      |
| Maluku - Papua     | 0.0146  | -<br>4.2881 | 4.3173 | negligible | 0.0000 | -<br>0.9740 | 0.9740 | negligible |

---

**Table S3G.** Effect size of odd ratios for high-salt food consumption variable

| Island cluster comparison       | Cohen's d    |         |         |             | Cliff's Delta |       |       |             |
|---------------------------------|--------------|---------|---------|-------------|---------------|-------|-------|-------------|
|                                 | D Estimation | 95 CI   |         | Effect Size | D Estimation  | 95 CI |       | Effect Size |
|                                 |              | Lower   | Upper   |             |               | Lower | Upper |             |
| Sumatera - Java                 | -0.0123      | -4.3150 | 4.2904  | negligible  | 0.000         | -     | 0.974 | negligible  |
| Sumatera - Bali_Nusa Tenggara   | -2.3398      | -7.9238 | 3.2443  | large       | -1.000        | -     | 1.000 | large       |
| Sumatera - Kalimantan           | -0.4308      | -4.7830 | 3.9215  | small       | -0.500        | -     | 0.981 | large       |
| Sumatera - Sulawesi             | 2.3659       | -3.2436 | 7.9753  | large       | 1.000         | -     | 0.828 | large       |
| Sumatera - Maluku               | -1.8731      | -7.0337 | 3.2875  | large       | -1.000        | -     | 1.000 | large       |
| Sumatera - Papua                | -0.1641      | -4.4739 | 4.1458  | negligible  | 0.000         | -     | 0.974 | negligible  |
| Java - Bali_Nusa Tenggara       | -2.6021      | -8.4486 | 3.2444  | large       | -1.000        | -     | 1.000 | large       |
| Java - Kalimantan               | -0.5624      | -4.9492 | 3.8245  | medium      | -0.500        | -     | 0.981 | large       |
| Java - Sulawesi                 | 5.1171       | -3.7771 | 14.0114 | large       | 1.000         | -     | 0.828 | large       |
| Java - Maluku                   | -1.9841      | -7.2399 | 3.2716  | large       | -1.000        | -     | 1.000 | large       |
| Java - Papua                    | -0.1726      | -4.4832 | 4.1381  | negligible  | 0.000         | -     | 0.974 | negligible  |
| Bali_Nusa Tenggara - Kalimantan | 2.0991       | -3.2590 | 7.4573  | large       | 1.000         | -     | 0.828 | large       |
| Bali_Nusa Tenggara - Sulawesi   | 4.0394       | -3.4620 | 11.5409 | large       | 1.000         | -     | 0.828 | large       |
| Bali_Nusa Tenggara - Maluku     | -0.0805      | -4.3849 | 4.2239  | negligible  | 0.000         | -     | 0.974 | negligible  |
| Bali_Nusa Tenggara - Papua      | 1.6460       | -3.3322 | 6.6241  | large       | 1.000         | -     | 0.828 | large       |
| Kalimantan - Sulawesi           | 3.2402       | -3.3026 | 9.7830  | large       | 1.000         | -     | 0.828 | large       |

|                     |         |         |        |            |        |   |       |       |            |
|---------------------|---------|---------|--------|------------|--------|---|-------|-------|------------|
| Kalimantan - Maluku | -1.6758 | -6.6769 | 3.3254 | large      | -1.000 | - | 1.000 | 0.828 | large      |
| Kalimantan - Papua  | 0.0990  | -4.2062 | 4.4043 | negligible | 0.000  | - | 0.974 | 0.974 | negligible |
| Sulawesi - Maluku   | -2.9891 | -9.2491 | 3.2710 | large      | -1.000 | - | 1.000 | 0.828 | large      |
| Sulawesi - Papua    | -1.3839 | -6.1739 | 3.4062 | large      | -1.000 | - | 1.000 | 0.828 | large      |
| Maluku - Papua      | 1.4576  | -3.3828 | 6.2979 | large      | 1.000  | - | 0.828 | 1.000 | large      |

**Table S3H.** Effect size of odd ratios for high-fat food consumption variable

| Island cluster comparison       | Cohen's d    |       |        |             | Cliff's Delta |         |       |             |        |            |
|---------------------------------|--------------|-------|--------|-------------|---------------|---------|-------|-------------|--------|------------|
|                                 | D Estimation | 95 CI |        | Effect Size | D Estimation  | 95 CI   |       | Effect Size |        |            |
|                                 |              | Lower | Upper  |             |               | Lower   | Upper |             |        |            |
| Sumatera - Java                 | -0.0990      | -     | 4.4043 | 4.2063      | negligible    | 0.0000  | -     | 0.9740      | 0.9740 | negligible |
| Sumatera - Bali_Nusa Tenggara   | -1.7946      | -     | 6.8902 | 3.3010      | large         | -1.0000 | -     | 1.0000      | 0.8283 | large      |
| Sumatera - Kalimantan           | -1.2369      | -     | 5.9330 | 3.4592      | large         | -0.5000 | -     | 0.9811      | 0.8416 | large      |
| Sumatera - Sulawesi             | -2.0567      | -     | 7.3767 | 3.2632      | large         | -1.0000 | -     | 1.0000      | 0.8283 | large      |
| Sumatera - Maluku               | 1.2061       | -     | 3.4714 | 5.8836      | large         | 1.0000  | -     | 0.8283      | 1.0000 | large      |
| Sumatera - Papua                | 0.5999       | -     | 3.7985 | 4.9982      | medium        | 0.5000  | -     | 0.8416      | 0.9811 | large      |
| Java - Bali_Nusa Tenggara       | -1.9740      | -     | 7.2209 | 3.2729      | large         | -1.0000 | -     | 1.0000      | 0.8283 | large      |
| Java - Kalimantan               | -1.4658      | -     | 6.3120 | 3.3803      | large         | -1.0000 | -     | 1.0000      | 0.8283 | large      |
| Java - Sulawesi                 | -2.2121      | -     | 7.6744 | 3.2502      | large         | -1.0000 | -     | 1.0000      | 0.8283 | large      |
| Java - Maluku                   | 2.4289       | -     | 3.2425 | 8.1002      | large         | 1.0000  | -     | 0.8283      | 1.0000 | large      |
| Java - Papua                    | 0.7961       | -     | 3.6738 | 5.2659      | medium        | 0.5000  | -     | 0.8416      | 0.9811 | large      |
| Bali_Nusa Tenggara - Kalimantan | 0.8432       | -     | 3.6466 | 5.3330      | large         | 0.5000  | -     | 0.8416      | 0.9811 | large      |
| Bali_Nusa Tenggara - Sulawesi   | -0.4086      | -     | 4.7560 | 3.9387      | small         | -0.5000 | -     | 0.9811      | 0.8416 | large      |
| Bali_Nusa Tenggara - Maluku     | 3.0088       | -     | 3.2731 | 9.2907      | large         | 1.0000  | -     | 0.8283      | 1.0000 | large      |
| Bali_Nusa Tenggara - Papua      | 2.1701       | -     | 3.2531 | 7.5932      | large         | 1.0000  | -     | 0.8283      | 1.0000 | large      |
| Kalimantan - Sulawesi           | -1.2152      | -     | 5.8981 | 3.4678      | large         | -0.5000 | -     | 0.9811      | 0.8416 | large      |
| Kalimantan - Maluku             | 3.0638       | -     | 3.2793 | 9.4070      | large         | 1.0000  | -     | 0.8283      | 1.0000 | large      |

|                    |         |        |        |       |        |        |        |            |
|--------------------|---------|--------|--------|-------|--------|--------|--------|------------|
|                    |         | -      |        |       |        | -      |        |            |
| Kalimantan - Papua | 1.7191  | 3.3160 | 6.7541 | large | 1.0000 | 0.8283 | 1.0000 | large      |
|                    |         | -      |        |       |        | -      |        |            |
| Sulawesi - Maluku  | 3.0851  | 3.2819 | 9.4521 | large | 1.0000 | 0.8283 | 1.0000 | large      |
|                    |         | -      |        |       |        | -      |        |            |
| Sulawesi - Papua   | 2.3922  | 3.2430 | 8.0275 | large | 1.0000 | 0.8283 | 1.0000 | large      |
|                    |         | -      |        |       |        | -      |        |            |
| Maluku - Papua     | -0.2220 | 4.5379 | 4.0939 | small | 0.0000 | 0.9740 | 0.9740 | negligible |

---

**Table S3I.** Effect size of odd ratios for meat food consumption variable

| Island cluster comparison       | Cohen's d    |             |               |             | Cliff's Delta |             |               |             |
|---------------------------------|--------------|-------------|---------------|-------------|---------------|-------------|---------------|-------------|
|                                 | D Estimation | 95 CI Lower | 95 CI Upper   | Effect Size | D Estimation  | 95 CI Lower | 95 CI Upper   | Effect Size |
| Sumatera - Java                 | 1.0076       | -           | 3.5599 5.5752 | large       | 0.5000        | -           | 0.8416 0.9811 | large       |
| Sumatera - Bali_Nusa Tenggara   | 0.0965       | -           | 4.2086 4.4017 | negligible  | 0.0000        | -           | 0.9740 0.9740 | negligible  |
| Sumatera - Kalimantan           | 1.0280       | -           | 3.5500 5.6060 | large       | 0.5000        | -           | 0.8416 0.9811 | large       |
| Sumatera - Sulawesi             | 0.7879       | -           | 3.6785 5.2544 | medium      | 0.5000        | -           | 0.8416 0.9811 | large       |
| Sumatera - Maluku               | 1.1971       | -           | 3.4751 5.8692 | large       | 0.5000        | -           | 0.8416 0.9811 | large       |
| Sumatera - Papua                | -0.1900      | -           | 4.5023 4.1224 | negligible  | 0.0000        | -           | 0.9740 0.9740 | negligible  |
| Java - Bali_Nusa Tenggara       | -1.2017      | -           | 5.8766 3.4732 | large       | -0.5000       | -           | 0.9811 0.8416 | large       |
| Java - Kalimantan               | -0.0500      | -           | 4.3534 4.2533 | negligible  | 0.0000        | -           | 0.9740 0.9740 | negligible  |
| Java - Sulawesi                 | -0.4170      | -           | 4.7662 3.9321 | small       | -0.5000       | -           | 0.9811 0.8416 | large       |
| Java - Maluku                   | 0.4767       | -           | 3.8866 4.8401 | small       | 0.5000        | -           | 0.8416 0.9811 | large       |
| Java - Papua                    | -2.1970      | -           | 7.6451 3.2512 | large       | -1.0000       | -           | 1.0000 0.8283 | large       |
| Bali_Nusa Tenggara - Kalimantan | 1.2664       | -           | 3.4478 5.9807 | large       | 0.7500        | -           | 0.5776 0.9891 | large       |
| Bali_Nusa Tenggara - Sulawesi   | 0.9043       | -           | 3.6129 5.4215 | large       | 0.5000        | -           | 0.8416 0.9811 | large       |
| Bali_Nusa Tenggara - Maluku     | 1.3571       | -           | 3.4152 6.1295 | large       | 0.5000        | -           | 0.8416 0.9811 | large       |
| Bali_Nusa Tenggara - Papua      | -0.3922      | -           | 4.7361 3.9516 | small       | -0.5000       | -           | 0.9811 0.8416 | large       |
| Kalimantan - Sulawesi           | -0.4485      | -           | 4.8049 3.9079 | small       | -0.5000       | -           | 0.9811 0.8416 | large       |
| Kalimantan - Maluku             | 0.5463       | -           | 3.8359 4.9284 | medium      | 0.0000        | -           | 0.9740 0.9740 | negligible  |

|                    |         |             |        |        |         |             |        |       |
|--------------------|---------|-------------|--------|--------|---------|-------------|--------|-------|
| Kalimantan - Papua | -2.5148 | -<br>8.2722 | 3.2426 | large  | -1.0000 | -<br>1.0000 | 0.8283 | large |
| Sulawesi - Maluku  | 0.7605  | -<br>3.6950 | 5.2159 | medium | 0.5000  | -<br>0.8416 | 0.9811 | large |
| Sulawesi - Papua   | -1.7700 | -<br>6.8456 | 3.3057 | large  | -1.0000 | -<br>1.0000 | 0.8283 | large |
| Maluku - Papua     | -2.0248 | -<br>7.3164 | 3.2667 | large  | -1.0000 | -<br>1.0000 | 0.8283 | large |

---



**Table S3J.** Effect size of odd ratios for carbonated drink consumption variable

| Island cluster comparison       | Cohen's d    |             |               |             | Cliff's Delta |             |               |             |
|---------------------------------|--------------|-------------|---------------|-------------|---------------|-------------|---------------|-------------|
|                                 | D Estimation | 95 CI Lower | 95 CI Upper   | Effect Size | D Estimation  | 95 CI Lower | 95 CI Upper   | Effect Size |
| Sumatera - Java                 | -0.6730      | -           | 5.0958 3.7498 | medium      | 0.0000        | -           | 0.9740 0.9740 | negligible  |
| Sumatera - Bali_Nusa Tenggara   | 0.2245       | -           | 4.0917 4.5406 | small       | 0.0000        | -           | 0.9740 0.9740 | negligible  |
| Sumatera - Kalimantan           | -0.2527      | -           | 4.5725 4.0671 | small       | -0.5000       | -           | 0.9811 0.8416 | large       |
| Sumatera - Sulawesi             | -1.5862      | -           | 6.5193 3.3469 | large       | -1.0000       | -           | 1.0000 0.8283 | large       |
| Sumatera - Maluku               | -1.2696      | -           | 5.9858 3.4467 | large       | -1.0000       | -           | 1.0000 0.8283 | large       |
| Sumatera - Papua                | -0.9947      | -           | 5.5556 3.5663 | large       | -0.5000       | -           | 0.9811 0.8416 | large       |
| Java - Bali_Nusa Tenggara       | 0.4306       | -           | 3.9216 4.7828 | small       | 0.0000        | -           | 0.9740 0.9740 | negligible  |
| Java - Kalimantan               | 0.3880       | -           | 3.9549 4.7309 | small       | 0.0000        | -           | 0.9740 0.9740 | negligible  |
| Java - Sulawesi                 | -1.4402      | -           | 6.2685 3.3881 | large       | -1.0000       | -           | 1.0000 0.8283 | large       |
| Java - Maluku                   | -1.1388      | -           | 5.7771 3.4995 | large       | -1.0000       | -           | 1.0000 0.8283 | large       |
| Java - Papua                    | -0.8961      | -           | 5.4096 3.6173 | large       | 0.0000        | -           | 0.9740 0.9740 | negligible  |
| Bali_Nusa Tenggara - Kalimantan | -0.3211      | -           | 4.6514 4.0092 | small       | 0.0000        | -           | 0.9740 0.9740 | negligible  |
| Bali_Nusa Tenggara - Sulawesi   | -1.0095      | -           | 5.5780 3.5590 | large       | -0.5000       | -           | 0.9811 0.8416 | large       |
| Bali_Nusa Tenggara - Maluku     | -1.1455      | -           | 5.7876 3.4966 | large       | -0.5000       | -           | 0.9811 0.8416 | large       |
| Bali_Nusa Tenggara - Papua      | -0.9922      | -           | 5.5520 3.5675 | large       | -0.5000       | -           | 0.9811 0.8416 | large       |
| Kalimantan - Sulawesi           | -1.4588      | -           | 6.3000 3.3824 | large       | -1.0000       | -           | 1.0000 0.8283 | large       |
| Kalimantan - Maluku             | -1.1967      | -           | 5.8686 3.4752 | large       | -1.0000       | -           | 1.0000 0.8283 | large       |

---

|                    |         |             |        |            |         |             |        |            |
|--------------------|---------|-------------|--------|------------|---------|-------------|--------|------------|
| Kalimantan - Papua | -0.9430 | -<br>5.4785 | 3.5925 | large      | -0.5000 | -<br>0.9811 | 0.8416 | large      |
| Sulawesi - Maluku  | -0.5098 | -<br>4.8818 | 3.8622 | medium     | 0.0000  | -<br>0.9740 | 0.9740 | negligible |
| Sulawesi - Papua   | -0.4894 | -<br>4.8560 | 3.8772 | small      | 0.0000  | -<br>0.9740 | 0.9740 | negligible |
| Maluku - Papua     | -0.1192 | -<br>4.4256 | 4.1873 | negligible | 0.0000  | -<br>0.9740 | 0.9740 | negligible |

---

**Table S3K.** Effect size of odd ratios for energy drink consumption variable

| Island cluster comparison       | Cohen's d    |          |         |             | Cliff's Delta |       |               |             |
|---------------------------------|--------------|----------|---------|-------------|---------------|-------|---------------|-------------|
|                                 | D Estimation | 95 CI    |         | Effect Size | D Estimation  | 95 CI |               | Effect Size |
|                                 |              | Lower    | Upper   |             |               | Lower | Upper         |             |
| Sumatera - Java                 | 0.6993       | -3.7329  | 5.1315  | medium      | 0.5000        | -     | 0.8416 0.9811 | large       |
| Sumatera - Bali_Nusa Tenggara   | -2.3484      | -7.9407  | 3.2440  | large       | -1.0000       | -     | 1.0000 0.8283 | large       |
| Sumatera - Kalimantan           | 2.9904       | -3.2711  | 9.2520  | large       | 1.0000        | -     | 0.8283 1.0000 | large       |
| Sumatera - Sulawesi             | 5.6664       | -3.9676  | 15.3005 | large       | 1.0000        | -     | 0.8283 1.0000 | large       |
| Sumatera - Maluku               | -0.0851      | -4.3897  | 4.2195  | negligible  | 0.0000        | -     | 0.9740 0.9740 | negligible  |
| Sumatera - Papua                | -1.2963      | -6.0294  | 3.4367  | large       | -0.5000       | -     | 0.9811 0.8416 | large       |
| Java - Bali_Nusa Tenggara       | -4.0550      | -11.5759 | 3.4659  | large       | -1.0000       | -     | 1.0000 0.8283 | large       |
| Java - Kalimantan               | 2.7886       | -3.2536  | 8.8308  | large       | 1.0000        | -     | 0.8283 1.0000 | large       |
| Java - Sulawesi                 | 6.1032       | -4.1296  | 16.3361 | large       | 1.0000        | -     | 0.8283 1.0000 | large       |
| Java - Maluku                   | -0.5407      | -4.9213  | 3.8398  | medium      | -0.2500       | -     | 0.9760 0.9347 | small       |
| Java - Papua                    | -2.0924      | -7.4445  | 3.2596  | large       | -1.0000       | -     | 1.0000 0.8283 | large       |
| Bali_Nusa Tenggara - Kalimantan | 9.8858       | -5.7561  | 25.5277 | large       | 1.0000        | -     | 0.8283 1.0000 | large       |
| Bali_Nusa Tenggara - Sulawesi   | 13.6667      | -7.5639  | 34.8972 | large       | 1.0000        | -     | 0.8283 1.0000 | large       |
| Bali_Nusa Tenggara - Maluku     | 1.2864       | -3.4403  | 6.0132  | large       | 1.0000        | -     | 0.8283 1.0000 | large       |
| Bali_Nusa Tenggara - Papua      | 0.4725       | -3.8898  | 4.8348  | small       | 0.0000        | -     | 0.9740 0.9740 | negligible  |
| Kalimantan - Sulawesi           | 4.6093       | -3.6173  | 12.8360 | large       | 1.0000        | -     | 0.8283 1.0000 | large       |

---

|                     |         |          |        |       |         |   |        |        |       |
|---------------------|---------|----------|--------|-------|---------|---|--------|--------|-------|
| Kalimantan - Maluku | -1.8720 | -7.0316  | 3.2877 | large | -1.0000 | - | 1.0000 | 0.8283 | large |
| Kalimantan - Papua  | -4.3077 | -12.1471 | 3.5316 | large | -1.0000 | - | 1.0000 | 0.8283 | large |
| Sulawesi - Maluku   | -3.5346 | -10.4212 | 3.3519 | large | -1.0000 | - | 1.0000 | 0.8283 | large |
| Sulawesi - Papua    | -6.7049 | -17.7750 | 4.3651 | large | -1.0000 | - | 1.0000 | 0.8283 | large |
| Maluku - Papua      | -0.8445 | -5.3349  | 3.6458 | large | -0.5000 | - | 0.9811 | 0.8416 | large |

---

**Table S3L.** Effect size of odd ratios for preserved and instant food consumption variable

| Island cluster comparison       | Cohen's d    |             |               |             | Cliff's Delta |             |               |             |
|---------------------------------|--------------|-------------|---------------|-------------|---------------|-------------|---------------|-------------|
|                                 | D Estimation | 95 CI Lower | 95 CI Upper   | Effect Size | D Estimation  | 95 CI Lower | 95 CI Upper   | Effect Size |
| Sumatera - Java                 | -1.6506      | -           | 6.6324 3.3311 | large       | -1.0000       | -           | 1.0000 0.8283 | large       |
| Sumatera - Bali_Nusa Tenggara   | 1.3644       | -           | 3.4127 6.1415 | large       | 1.0000        | -           | 0.8283 1.0000 | large       |
| Sumatera - Kalimantan           | 0.3409       | -           | 3.9929 4.6746 | small       | 0.0000        | -           | 0.9740 0.9740 | negligible  |
| Sumatera - Sulawesi             | 1.6927       | -           | 3.3216 6.7070 | large       | 1.0000        | -           | 0.8283 1.0000 | large       |
| Sumatera - Maluku               | 0.8989       | -           | 3.6158 5.4136 | large       | 0.5000        | -           | 0.8416 0.9811 | large       |
| Sumatera - Papua                | -1.2802      | -           | 6.0031 3.4426 | large       | -0.5000       | -           | 0.9811 0.8416 | large       |
| Java - Bali_Nusa Tenggara       | 1.9577       | -           | 3.2751 7.1905 | large       | 1.0000        | -           | 0.8283 1.0000 | large       |
| Java - Kalimantan               | 1.1576       | -           | 3.4914 5.8067 | large       | 0.5000        | -           | 0.8416 0.9811 | large       |
| Java - Sulawesi                 | 2.3829       | -           | 3.2432 8.0091 | large       | 1.0000        | -           | 0.8283 1.0000 | large       |
| Java - Maluku                   | 1.8385       | -           | 3.2932 6.9702 | large       | 1.0000        | -           | 0.8283 1.0000 | large       |
| Java - Papua                    | 0.9364       | -           | 3.5959 5.4687 | large       | 0.5000        | -           | 0.8416 0.9811 | large       |
| Bali_Nusa Tenggara - Kalimantan | 0.1791       | -           | 4.1322 4.4904 | negligible  | 0.0000        | -           | 0.9740 0.9740 | negligible  |
| Bali_Nusa Tenggara - Sulawesi   | 1.3571       | -           | 3.4152 6.1294 | large       | 1.0000        | -           | 0.8283 1.0000 | large       |
| Bali_Nusa Tenggara - Maluku     | 0.6415       | -           | 3.7705 5.0534 | medium      | 0.0000        | -           | 0.9740 0.9740 | negligible  |
| Bali_Nusa Tenggara - Papua      | -1.9793      | -           | 7.2308 3.2722 | large       | -1.0000       | -           | 1.0000 0.8283 | large       |
| Kalimantan - Sulawesi           | 0.3415       | -           | 3.9924 4.6754 | small       | 0.0000        | -           | 0.9740 0.9740 | negligible  |
| Kalimantan - Maluku             | 0.1751       | -           | 4.1358 4.4860 | negligible  | 0.0000        | -           | 0.9740 0.9740 | negligible  |

---

|                    |         |             |        |        |         |             |        |            |
|--------------------|---------|-------------|--------|--------|---------|-------------|--------|------------|
| Kalimantan - Papua | -0.7045 | -<br>5.1386 | 3.7296 | medium | -0.5000 | -<br>0.9811 | 0.8416 | large      |
| Sulawesi - Maluku  | -0.2279 | -<br>4.5445 | 4.0887 | small  | 0.0000  | -<br>0.9740 | 0.9740 | negligible |
| Sulawesi - Papua   | -2.2443 | -<br>7.7368 | 3.2483 | large  | -1.0000 | -<br>1.0000 | 0.8283 | large      |
| Maluku - Papua     | -1.4197 | -<br>6.2339 | 3.3946 | large  | -1.0000 | -<br>1.0000 | 0.8283 | large      |

---

**Table S3M.** Effect size of odd ratios for smoking exposure variable

| Island cluster comparison       | Cohen's d    |       |        |             | Cliff's Delta |         |       |             |        |            |
|---------------------------------|--------------|-------|--------|-------------|---------------|---------|-------|-------------|--------|------------|
|                                 | D Estimation | 95 CI |        | Effect Size | D Estimation  | 95 CI   |       | Effect Size |        |            |
|                                 |              | Lower | Upper  |             |               | Lower   | Upper |             |        |            |
| Sumatera - Java                 | 0.2979       | -     | 4.0286 | 4.6244      | small         | 0.5000  | -     | 0.8416      | 0.9811 | large      |
| Sumatera - Bali_Nusa Tenggara   | 0.4267       | -     | 3.9246 | 4.7781      | small         | 0.5000  | -     | 0.8416      | 0.9811 | large      |
| Sumatera - Kalimantan           | 0.1267       | -     | 4.1803 | 4.4336      | negligible    | 0.5000  | -     | 0.8416      | 0.9811 | large      |
| Sumatera - Sulawesi             | 0.6716       | -     | 3.7507 | 5.0938      | medium        | 0.5000  | -     | 0.8416      | 0.9811 | large      |
| Sumatera - Maluku               | -0.4437      | -     | 4.7989 | 3.9116      | small         | 0.0000  | -     | 0.9740      | 0.9740 | negligible |
| Sumatera - Papua                | 0.1200       | -     | 4.1865 | 4.4265      | negligible    | 0.0000  | -     | 0.9740      | 0.9740 | negligible |
| Java - Bali_Nusa Tenggara       | 0.1086       | -     | 4.1973 | 4.4144      | negligible    | 0.5000  | -     | 0.8416      | 0.9811 | large      |
| Java - Kalimantan               | -0.1534      | -     | 4.4624 | 4.1556      | negligible    | -0.5000 | -     | 0.9811      | 0.8416 | large      |
| Java - Sulawesi                 | 0.3236       | -     | 4.0071 | 4.6544      | small         | 0.5000  | -     | 0.8416      | 0.9811 | large      |
| Java - Maluku                   | -0.6058      | -     | 5.0060 | 3.7945      | medium        | -0.5000 | -     | 0.9811      | 0.8416 | large      |
| Java - Papua                    | -0.2467      | -     | 4.5657 | 4.0723      | small         | 0.0000  | -     | 0.9740      | 0.9740 | negligible |
| Bali_Nusa Tenggara - Kalimantan | -0.2639      | -     | 4.5853 | 4.0574      | small         | -0.5000 | -     | 0.9811      | 0.8416 | large      |
| Bali_Nusa Tenggara - Sulawesi   | 0.2235       | -     | 4.0926 | 4.5395      | small         | 0.5000  | -     | 0.8416      | 0.9811 | large      |
| Bali_Nusa Tenggara - Maluku     | -0.6746      | -     | 5.0979 | 3.7487      | medium        | -0.5000 | -     | 0.9811      | 0.8416 | large      |
| Bali_Nusa Tenggara - Papua      | -0.4103      | -     | 4.7580 | 3.9374      | small         | -0.5000 | -     | 0.9811      | 0.8416 | large      |
| Kalimantan - Sulawesi           | 0.4748       | -     | 3.8881 | 4.8376      | small         | 0.5000  | -     | 0.8416      | 0.9811 | large      |
| Kalimantan - Maluku             | -0.5067      | -     | 4.8778 | 3.8645      | medium        | -0.5000 | -     | 0.9811      | 0.8416 | large      |

|                    |         |        |        |            |         |        |        |            |
|--------------------|---------|--------|--------|------------|---------|--------|--------|------------|
|                    |         | -      |        |            |         | -      |        |            |
| Kalimantan - Papua | -0.0426 | 4.3457 | 4.2606 | negligible | 0.0000  | 0.9740 | 0.9740 | negligible |
|                    |         | -      |        |            |         | -      |        |            |
| Sulawesi - Maluku  | -0.7931 | 5.2617 | 3.6755 | medium     | -0.5000 | 0.9811 | 0.8416 | large      |
|                    |         | -      |        |            |         | -      |        |            |
| Sulawesi - Papua   | -0.7481 | 5.1987 | 3.7025 | medium     | -0.5000 | 0.9811 | 0.8416 | large      |
|                    |         | -      |        |            |         | -      |        |            |
| Maluku - Papua     | 0.5240  | 3.8519 | 4.8999 | medium     | 0.0000  | 0.9740 | 0.9740 | negligible |



**Table S3N.** Effect size of odd ratios for hypertension status variable

| Island cluster comparison       | Cohen's d    |       |        |             | Cliff's Delta |         |       |             |        |            |
|---------------------------------|--------------|-------|--------|-------------|---------------|---------|-------|-------------|--------|------------|
|                                 | D Estimation | 95 CI |        | Effect Size | D Estimation  | 95 CI   |       | Effect Size |        |            |
|                                 |              | Lower | Upper  |             |               | Lower   | Upper |             |        |            |
| Sumatera - Java                 | -0.1724      | -     | 2.4435 | 2.0988      | negligible    | -0.3333 | -     | 0.8502      | 0.5107 | medium     |
| Sumatera - Bali_Nusa Tenggara   | -0.3938      | -     | 2.6827 | 1.8950      | small         | -0.3333 | -     | 0.8502      | 0.5107 | medium     |
| Sumatera - Kalimantan           | -0.2648      | -     | 2.5416 | 2.0121      | small         | -0.3333 | -     | 0.8502      | 0.5107 | medium     |
| Sumatera - Sulawesi             | -0.0656      | -     | 2.3332 | 2.2020      | negligible    | -0.1111 | -     | 0.8828      | 0.8227 | negligible |
| Sumatera - Maluku               | -0.2398      | -     | 2.5149 | 2.0353      | small         | -0.3333 | -     | 0.8502      | 0.5107 | medium     |
| Sumatera - Papua                | 0.2632       | -     | 2.0135 | 2.5400      | small         | 0.3333  | -     | 0.6820      | 0.9097 | medium     |
| Java - Bali_Nusa Tenggara       | -0.2242      | -     | 2.4983 | 2.0498      | small         | -0.3333 | -     | 0.8502      | 0.5107 | medium     |
| Java - Kalimantan               | -0.0979      | -     | 2.3662 | 2.1704      | negligible    | -0.1111 | -     | 0.7930      | 0.6943 | negligible |
| Java - Sulawesi                 | 0.1168       | -     | 2.1521 | 2.3856      | negligible    | 0.1111  | -     | 0.8227      | 0.8828 | negligible |
| Java - Maluku                   | -0.0729      | -     | 2.3406 | 2.1948      | negligible    | -0.1111 | -     | 0.7930      | 0.6943 | negligible |
| Java - Papua                    | 0.4409       | -     | 1.8534 | 2.7353      | small         | 0.3333  | -     | 0.6820      | 0.9097 | medium     |
| Bali_Nusa Tenggara - Kalimantan | 0.1216       | -     | 2.1475 | 2.3906      | negligible    | 0.3333  | -     | 0.6820      | 0.9097 | medium     |
| Bali_Nusa Tenggara - Sulawesi   | 0.3496       | -     | 1.9346 | 2.6338      | small         | 0.3333  | -     | 0.6820      | 0.9097 | medium     |
| Bali_Nusa Tenggara - Maluku     | 0.1464       | -     | 2.1236 | 2.4164      | negligible    | 0.3333  | -     | 0.6820      | 0.9097 | medium     |
| Bali_Nusa Tenggara - Papua      | 0.6624       | -     | 1.6659 | 2.9907      | medium        | 0.3333  | -     | 0.6820      | 0.9097 | medium     |
| Kalimantan - Sulawesi           | 0.2153       | -     | 2.0582 | 2.4889      | small         | 0.1111  | -     | 0.8227      | 0.8828 | negligible |
| Kalimantan - Maluku             | 0.0244       | -     | 2.2426 | 2.2915      | negligible    | -0.1111 | -     | 0.7930      | 0.6943 | negligible |

|                    |         |        |        |            |         |        |        |        |
|--------------------|---------|--------|--------|------------|---------|--------|--------|--------|
|                    |         | -      |        |            |         | -      |        |        |
| Kalimantan - Papua | 0.5245  | 1.7811 | 2.8301 | medium     | 0.3333  | 0.6820 | 0.9097 | medium |
|                    |         | -      |        |            |         | -      |        |        |
| Sulawesi - Maluku  | -0.1892 | 2.4612 | 2.0828 | negligible | -0.3333 | 0.8502 | 0.5107 | medium |
|                    |         | -      |        |            |         | -      |        |        |
| Sulawesi - Papua   | 0.3519  | 1.9325 | 2.6364 | small      | 0.3333  | 0.6820 | 0.9097 | medium |
|                    |         | -      |        |            |         | -      |        |        |
| Maluku - Papua     | 0.4991  | 1.8029 | 2.8011 | small      | 0.3333  | 0.6820 | 0.9097 | medium |
